# Supplementary material
Source: PubMed Central journal article supplement (PMC3841314)
Supplement: cc-12-2355-s01.pdf [file cc-12-2355-s01.pdf]

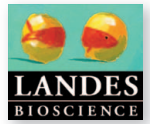

## **Supplemental Material to:**

**Clifford DL Folmes, D Kent Arrell, Jelena Zlatkovic-Lindor,  
Almudena Martinez Fernandez, Carmen Perez-Terzic,  
Timothy J Nelson, and Andre Terzic**

**Metabolome and metaboproteome remodeling in nuclear  
reprogramming**

**Cell Cycle 2013; 12(15)**

**<http://dx.doi.org/10.4161/cc.25509>**

**<http://www.landesbioscience.com/journals/cc/article/25509>**

**Supplemental Information**  
*Cell Cycle*

**Metabolome and metaboproteome remodeling in nuclear reprogramming**

Clifford D. L. Folmes, D. Kent Arrell, Jelena Zlatkovic-Lindor, Almudena Martinez-Fernandez, Carmen Perez-Terzic, Timothy J. Nelson and Andre Terzic

**Supplemental Figures**

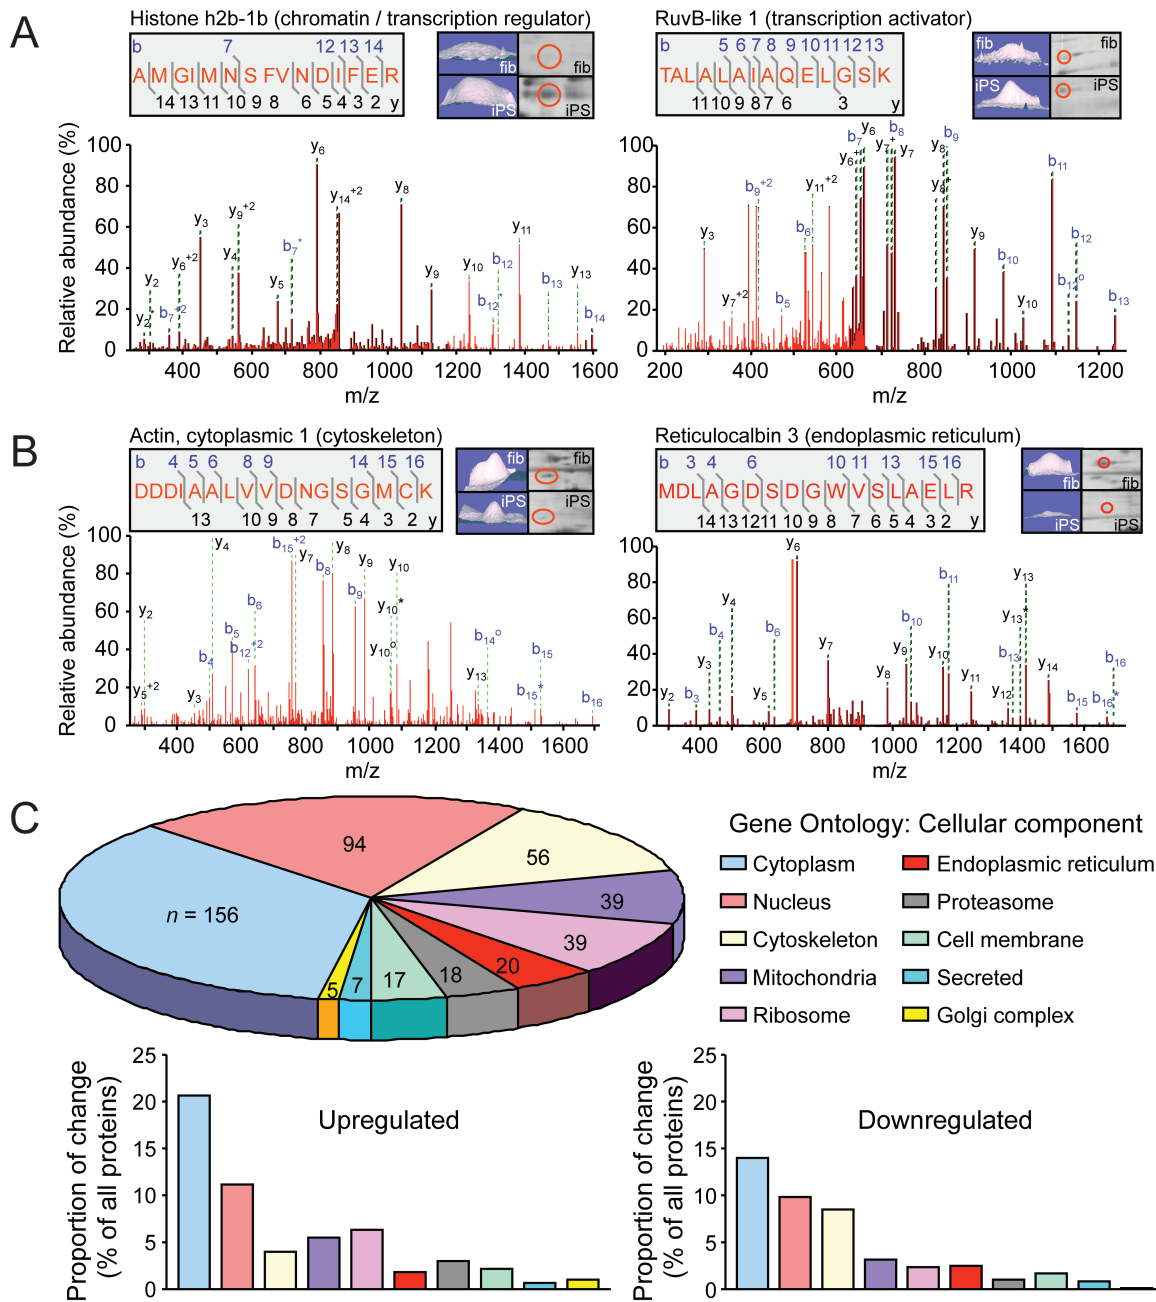

Supplemental Figure 1: Representative MS/MS spectra of representative upregulated (A) and downregulated proteins (B). Ontological analysis categorized all altered proteins across a spectrum of subcellular locations (cytoplasm, cytoskeleton, endoplasmic reticulum, Golgi complex, membrane, mitochondria, nucleus, proteasome, ribosome, and secreted) (C).

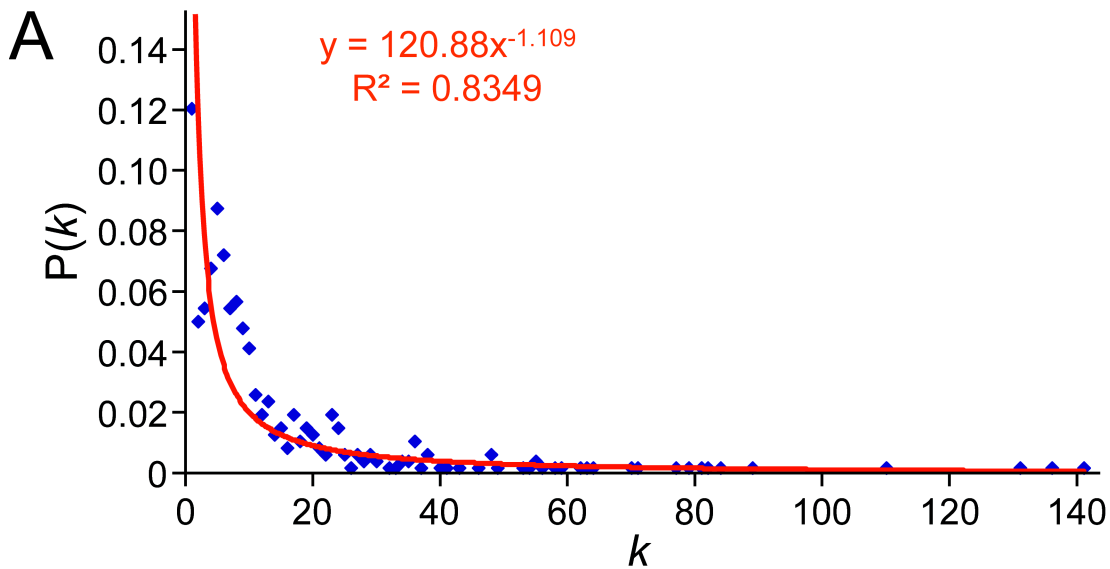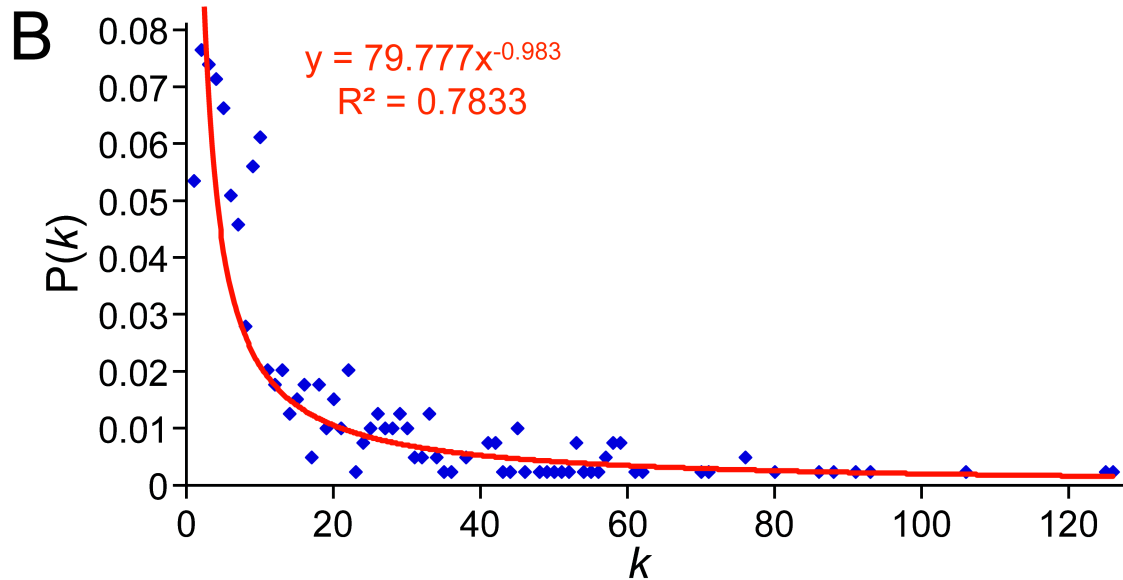

Supplementary Figure 2: Networks encompassing the upregulated (A) and downregulated (B) subproteomes exhibit network degree distribution with scale-free topology as defined by the relationship between node degree ( $k$ ) versus node degree distribution ( $P(k)$ ), the proportion of all nodes at each specified degree.
